# Supplementary material for: H-NS Silences Gene Expression of LeuO, the Master Regulator of the Cyclic(Phe-Pro)-dependent Signal Pathway, in Vibrio vulnificus
Source: PubMed Central journal article supplement (PMC9728156; doi:10.4014/jmb.2001.01021), 2020-03-27
Supplement: JMB-30-6-830-supple.pdf [file JMB-30-6-830-supple.pdf]

Table S1. Bacterial strains and plasmids used in this study.

| Strains or plasmids                                | Genotypes                                                                                                                                                    | Sources        |
|----------------------------------------------------|--------------------------------------------------------------------------------------------------------------------------------------------------------------|----------------|
| <b>Strains</b>                                     |                                                                                                                                                              |                |
| <i>E. coli</i>                                     |                                                                                                                                                              |                |
| DH5 $\alpha$                                       | $\lambda$ φ80dlacZΔM15Δ(lacZYA-argF)U169 <i>recA1 endA1 hsdR17</i> (r <sub>K</sub> <sup>-</sup> m <sub>K</sub> <sup>-</sup> ) <i>supE44 thi-1 gyrA relA1</i> | Our collection |
| S17-1                                              | [C600::RP4-2 (Tc::Mu)(Km::Tn7) <i>thi pro hsdRM<sup>+</sup> recA</i>                                                                                         | 1              |
| S17-1 $\lambda$ <i>pir</i>                         | S17-1 with $\lambda$ <i>pir</i> lysogen                                                                                                                      | 1              |
| BL21(DE3)                                          | F <sup>-</sup> <i>ompT hsdSB</i> (r <sub>B</sub> <sup>-</sup> , m <sub>B</sub> <sup>-</sup> ) <i>gal dcm</i> (DE3)                                           | Novagen        |
| GI698                                              | F <sup>-</sup> $\lambda$ <sup>-</sup> <i>lacIqlacPL8 ampC::Ptrp cI</i>                                                                                       | 2              |
| <i>V. vulnificus</i>                               |                                                                                                                                                              |                |
| MO6-24/O                                           | Pathogenic clinical isolate                                                                                                                                  | 3              |
| $\Delta$ <i>leuO</i>                               | Derivative of MO6-24/O with a deletion in <i>leuO</i>                                                                                                        | This study     |
| $\Delta$ <i>hns</i>                                | Derivative of MO6-24/O with a deletion in <i>hns</i>                                                                                                         | This study     |
| $\Delta$ <i>leuO<math>\Delta</math><i>hns</i></i>  | Derivative of MO6-24/O with double deletions in <i>leuO</i> and <i>hns</i>                                                                                   | This study     |
| $\Delta$ <i>toxRS<math>\Delta</math><i>hns</i></i> | Derivative of MO6-24/O with triple deletions in <i>toxRS</i> and <i>hns</i>                                                                                  | This study     |
| <b>Plasmids</b>                                    |                                                                                                                                                              |                |

|                          |                                                                                    |            |
|--------------------------|------------------------------------------------------------------------------------|------------|
| pGEM-T easy              | TA cloning vector, <i>lacZ</i> , f1 origin, Ap <sup>r</sup>                        | Promega    |
| pGEM-hns-up              | pGEM-T easy vector containing <i>leuO</i> upstream region                          | This study |
| pGEM-hns-down            | pGEM-T easy vector containing <i>leuO</i> downstream region                        | This study |
| pDM4                     | Suicide vector for an allelic exchange, <i>sacB</i> , Cm <sup>r</sup>              | 4          |
| pDM4- <i>dhns</i>        | pDM4 with a deletion in <i>hns</i> of <i>V. vulnificus</i>                         | This study |
| pDM4- <i>dleuO</i>       | pDM4 with a deletion in <i>leuO</i> of <i>V. vulnificus</i>                        | This study |
| pMZtc- <i>leuO</i>       | pMZtc with a promoter region of <i>leuO</i>                                        | 5          |
| pET21a                   | Expression vector, C-terminal His-tag, Ap <sup>r</sup>                             | Novagen    |
| pET-HNS                  | pET21a vector with <i>V. vulnificus</i> H-NS                                       | This study |
| pET-ToxR-N               | pET21a vector with <i>V. vulnificus</i> N-terminal domain of ToxR                  | 5          |
| pRE1- <i>leuO</i>        | <i>leuO</i> expression vector                                                      | 6          |
| pBBR12- <i>leuO</i> -ara | pBBR-MCS2 vector with the <i>V. vulnificus leuO</i> under the <i>araC</i> promoter | 5          |
| pBAD-TOPO                | Arabinose-regulated expression plasmid, Ap <sup>r</sup>                            | Invitrogen |
| pBBR12-hns-ara           | pBBR-MCS2 vector with the <i>V. vulnificus hns</i> under the <i>araC</i> promoter  | This study |

---

1. Simon R, Prier U, Pühler AA. 1983. broad host range mobilization system for *in*

*vivo* genetic engineering: transposon mutagenesis in gram negative bacteria. *Nature Biotechnol.* **1**: 784-791

2 Lavallie ER, DiBlasio EA, Kovacic S, Grant KL, Schendel PF, McCoy JM. 1993. A thioredoxin gene fusion expression system that circumvents inclusion body formation in the *E. coli* cytoplasm. *Nature Biotechnol.* **11**: 187-193

3 Reddy GP, Hayat U, Abeygunawardana C, Fox C, Wright AC, Maneval DR, *et al.* 1992. Purification and determination of the structure of capsular polysaccharide of *Vibrio vulnificus* M06-24. *J. Bacteriol.* **174**: 2620-2630

4 Milton DL, O'Toole R, Horstedt P, Wolf-Watz H. 1996. Flagellin A is essential for the virulence of *Vibrio anguillarum*. *J. Bacteriol.* **178**: 1310-1319

5. Park NY, Kim H, Wen Y, Lee KW, Lee S, Kim JA, *et al.* 2019. Multi-Factor Regulation of the Master Modulator LeuO for the Cyclic-(Phe-Pro) Signaling Pathway in *Vibrio vulnificus*. *Sci Rep.* **9**: 20135

6. Kim JA, Park JH, Lee MA, Lee HJ, Park SJ, Kim KS, *et al.* 2015. Stationary-phase induction of *vvpS* expression by three transcription factors: repression by LeuO and activation by SmcR and CRP. *Mol. Microbiol.* **97**: 330-346

Table S2. Primers used in this study.

| Function and Name                                                                                                                  | Nucleotide sequence (5' → 3')         |
|------------------------------------------------------------------------------------------------------------------------------------|---------------------------------------|
| <b>Construction of a <i>leuO</i>-deletion mutation</b>                                                                             |                                       |
| dleuO-up-F                                                                                                                         | AATCCCGGGAGAGCTCTTGGCTTAGCGACGGTGA    |
| dleuO-up-R                                                                                                                         | CAACCACTTCGCCACAGCTCATCGCATCTTTTTTATC |
| dleuO-down-F                                                                                                                       | AAAAGATGCGATGAGCTGTGGCGAAGTGGTTGCTGCG |
| dleuO-down-R                                                                                                                       | CGGGTAACTGAGCTCATCGAAGATTTTCACTGC     |
| <b>Construction of a <i>hns</i>-deletion mutation, a <i>leuO/hns</i> deletion mutation, and <i>toxRS/leuO</i> double mutations</b> |                                       |
| dhns-up-F                                                                                                                          | CCTGAGCATGCGGATGTCCGTTACTTATG         |
| dhns-up-R                                                                                                                          | TCAGGATCCCAACAGAGTTTTTGTTAG           |
| dhns-down-F                                                                                                                        | GTCGGATCCGCGGGTAAATCTCTAGAAGAT        |
| dhns-down-R                                                                                                                        | TACCTCGAGGTTGTTTTGACGCTTGGC           |
| <b>Construction of an arabinose-inducible H-NS expression system</b>                                                               |                                       |
| BAD-hns-F                                                                                                                          | ATGTCTGAACTAACAAAACTC                 |
| BAD-hns-R                                                                                                                          | TTAGATTTTCGAAATCTTC                   |
| pBAD-F                                                                                                                             | ATGCCATAGCATTTTTATCC                  |
| pBAD-R                                                                                                                             | GATTTAATCTGTATCAGG                    |
| <b>qRT-PCR for quantitative analysis of <i>leuO</i> and <i>hns</i> transcripts</b>                                                 |                                       |
| leuO_qPCR_F                                                                                                                        | TCAAACCTGGCGATTTGCAGC                 |
| leuO_qPCR_R                                                                                                                        | AGGATGCTGCTTAGACGTCAC                 |
| HNS_qPCR_F                                                                                                                         | GGAAGCAGAAGAACGTGCAG                  |

HNS\_qPCR\_R            AGCTTGGATTGCAGAAGGTGT

**ChIP analysis**

leuO-chIP-F            CGGAGTGGATCTCAACCTACTGAC

leuO-chIP-R            ACGCATGAAAAGCTCATCATTA

**Expression of a recombinant H-NS**

Pet-hns-F            GGATCCATGTCTGAACTAACAAAAC

Pet-hns-R            GTCGACGATTTCGAAATCTTCTAG

**DNaseI footprinting**

FP-leuO-F            CGCTAATATTGACGAGATTG

FP-leuO-F2            GGTACCCGCTAATATTGACGA

FP-leuO-F3            GTGGTGAAACAATAGTTAG

FP-leuO-R            GTCAGGAATAGATAACCTG

FP-leuO-R2            TTTGTTGATTA AAAACAT

---

Nucleotides modified for the generation of restriction sites are underlined.
